# Supplementary material for: Antiviral Potential of Small Molecules Cordycepin, Thymoquinone, and N6, N6-Dimethyladenosine Targeting SARS-CoV-2 Entry Protein ADAM17
Source: MDPI journal article supplement (doi:10.3390/molecules27249044), 2022-12-19
Supplement: s1 [file s1]

## **Supplementary Figure**

## Supplementary Figure S1

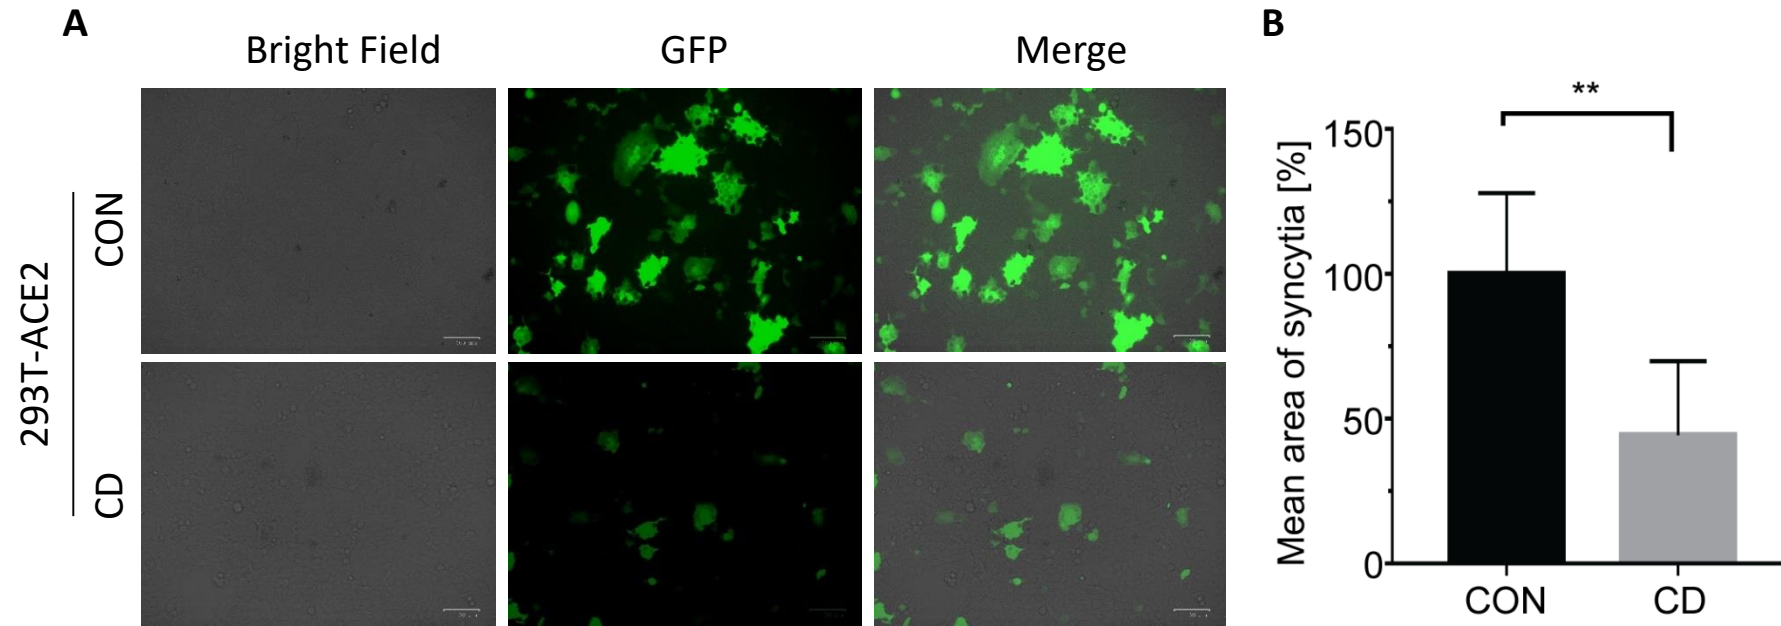

**Supplementary Figure S1. CD significantly inhibits syncytia formation.** A. Representative images of syncytia formation in control and CD-treated 293T-ACE2 cells. B. The quantitative
